# Supplementary material for: A novel approach to evaluate ELISA antibody coverage of host cell proteins—combining ELISA‐based immunocapture and mass spectrometry
Source: PubMed Central journal article supplement — Biotechnol Prog. 2020 Mar 9;36(4):e2983. doi: 10.1002/btpr.2983 (PMC7507178; doi:10.1002/btpr.2983), 2020-03-09
Supplement: BTPR-36-e2983-s001.pdf [file BTPR-36-e2983-s001.pdf]

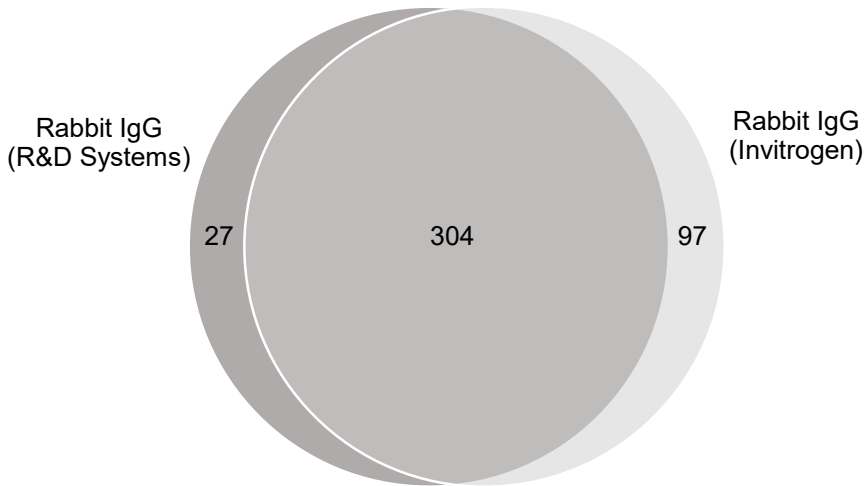

**Supplementary Figure 1:** Comparison of *E. coli* HCP identifications after immunocapture with rabbit control antibody from two different vendors. The Rabbit IgG from R&D Systems was used in the experiments presented in the results and discussion section.
